# Supplementary material for: Short impact on soil microbiome of a Bacillus amyloliquefaciens QST713 based product that correlates with higher potato yield across USA
Source: Front Plant Sci. 2024 Mar 12;15:1332840. doi: 10.3389/fpls.2024.1332840 (PMC10967024; doi:10.3389/fpls.2024.1332840)
Supplement: Supplementary file 2 [file Table_1.xlsx]

## Sheet: Table S1
Table S1. Sample list and its associated metadata (location, Treatment, Time, Sampling time, marke and microbiome diversity)
Location	Treatment	Time	Sampling time	marker	chao1	diversity_shannon
Loc1	Control	T0	04.15.2020	16S	1547.01	4.15579
Loc1	Control	T0	04.15.2020	16S	1621.34	3.91987
Loc1	Control	T0	04.15.2020	16S	1484.39	3.92924
Loc1	Treated	T0	04.15.2020	16S	1719.32	4.38762
Loc1	Treated	T0	04.15.2020	16S	1498.21	4.05222
Loc1	Treated	T0	04.15.2020	16S	1511.05	4.12845
Loc1	Control	T1	06.11.2020	16S	1353.05	3.78706
Loc1	Control	T1	06.11.2020	16S	1296.26	3.84757
Loc1	Control	T1	06.11.2020	16S	1092.34	3.62927
Loc1	Treated	T1	06.11.2020	16S	1299.86	3.64832
Loc1	Treated	T1	06.11.2020	16S	1558.92	3.88963
Loc1	Treated	T1	06.11.2020	16S	1148.05	3.37219
Loc2	Control	T0	04.16.2020	16S	1321.22	4.19736
Loc2	Control	T0	04.16.2020	16S	1265.2	4.05196
Loc2	Control	T0	04.16.2020	16S	1074.26	3.34983
Loc2	Treated	T0	04.16.2020	16S	1283.43	3.54991
Loc2	Treated	T0	04.16.2020	16S	1088.7	3.34136
Loc2	Treated	T0	04.16.2020	16S	1064.7	3.17549
Loc2	Control	T1	06.09.2020	16S	1918.56	3.96576
Loc2	Control	T1	06.09.2020	16S	893.667	4.1066
Loc2	Control	T1	06.09.2020	16S	949.793	4.0719
Loc2	Treated	T1	06.09.2020	16S	962.592	4.0245
Loc2	Treated	T1	06.09.2020	16S	889.588	4.17122
Loc2	Treated	T1	06.09.2020	16S	913.118	4.14988
Loc3	Control	T0	04.14.2020	16S	1633.71	4.94267
Loc3	Control	T0	04.14.2020	16S	1947.05	4.66185
Loc3	Control	T0	04.14.2020	16S	1862.86	4.83464
Loc3	Treated	T0	04.14.2020	16S	1840.54	4.97257
Loc3	Treated	T0	04.14.2020	16S	2013.22	4.77902
Loc3	Treated	T0	04.14.2020	16S	2112.97	4.8741
Loc3	Control	T1	06.05.2020	16S	842.294	3.41589
Loc3	Control	T1	06.05.2020	16S	788.835	3.53465
Loc3	Control	T1	06.05.2020	16S	666.917	3.47633
Loc3	Treated	T1	06.05.2020	16S	1119.51	3.89668
Loc3	Treated	T1	06.05.2020	16S	875.75	3.91271
Loc3	Treated	T1	06.05.2020	16S	997.098	4.02047
Loc6	Control	T0	05.01.2020	16S	972.702	3.42575
Loc6	Control	T0	05.01.2020	16S	1026.16	3.5403
Loc6	Control	T0	05.01.2020	16S	1293.13	3.61966
Loc6	Treated	T0	05.01.2020	16S	1379.38	3.53581
Loc6	Treated	T0	05.01.2020	16S	1481.38	3.79872
Loc6	Treated	T0	05.01.2020	16S	1236.42	3.19783
Loc6	Control	T0	05.01.2020	16S	1343.05	3.61228
Loc6	Control	T0	05.01.2020	16S	1512.35	3.86319
Loc6	Control	T0	05.01.2020	16S	866.417	3.69862
Loc6	Treated	T0	05.01.2020	16S	859.544	3.49313
Loc6	Treated	T0	05.01.2020	16S	957.053	3.79653
Loc6	Treated	T0	05.01.2020	16S	1163.56	3.77196
Loc7	Control	T0	05.01.2020	16S	2312.72	4.48727
Loc7	Control	T0	05.01.2020	16S	2113.97	3.79499
Loc7	Control	T0	05.01.2020	16S	2264.73	3.805
Loc7	Treated	T0	05.01.2020	16S	2466.14	3.72271
Loc7	Treated	T0	05.01.2020	16S	1817.25	3.80343
Loc7	Treated	T0	05.01.2020	16S	2272.27	3.88363
Loc7	Control	T1	06.15.2020	16S	1499.58	4.18461
Loc7	Control	T1	06.15.2020	16S	1247.53	3.98334
Loc7	Control	T1	06.15.2020	16S	1107.05	4.21429
Loc7	Treated	T1	06.15.2020	16S	2884.23	4.55618
Loc7	Treated	T1	06.15.2020	16S	1798.58	4.44573
Loc7	Treated	T1	06.15.2020	16S	1936.02	4.21006
Loc8	Control	T0	5.28.2020	16S	1651.56	4.50879
Loc8	Control	T0	5.28.2020	16S	1685.83	4.73661
Loc8	Control	T0	5.28.2020	16S	1610.96	4.69999
Loc8	Treated	T0	5.28.2020	16S	1830.02	4.64486
Loc8	Treated	T0	5.28.2020	16S	1770.78	4.84331
Loc8	Treated	T0	5.28.2020	16S	2108.6	4.96565
Loc8	Control	T1	07.13.2020	16S	1748.47	4.00758
Loc8	Control	T1	07.13.2020	16S	1576.26	4.64857
Loc8	Control	T1	07.13.2020	16S	1351.31	4.16633
Loc8	Treated	T1	07.13.2020	16S	1431.72	4.022
Loc8	Treated	T1	07.13.2020	16S	1534.15	4.28922
Loc8	Treated	T1	07.13.2020	16S	1298.01	3.83484
Loc9	Control	T0	05.01.2020	16S	2097.65	4.18335
Loc9	Control	T0	05.01.2020	16S	2119.58	4.00375
Loc9	Control	T0	05.01.2020	16S	2030.42	4.24298
Loc9	Treated	T0	05.01.2020	16S	2032.76	4.66973
Loc9	Treated	T0	05.01.2020	16S	1879.62	4.34104
Loc9	Treated	T0	05.01.2020	16S	2472.8	4.53459
Loc9	Control	T1	06.15.2020	16S	1391.6	4.02256
Loc9	Control	T1	06.15.2020	16S	1609.95	4.15727
Loc9	Control	T1	06.15.2020	16S	1621.43	4.35265
Loc9	Treated	T1	06.15.2020	16S	1392.95	4.37071
Loc9	Treated	T1	06.15.2020	16S	1678.82	4.2694
Loc9	Treated	T1	06.15.2020	16S	1498.45	3.75916
Loc10	Control	T0	04.02.2020	16S	2349.04	4.40813
Loc10	Control	T0	04.02.2020	16S	2193.84	4.42851
Loc10	Control	T0	04.02.2020	16S	2046.46	4.15829
Loc10	Treated	T0	04.02.2020	16S	2267.57	4.97604
Loc10	Treated	T0	04.02.2020	16S	1961.56	4.35686
Loc10	Treated	T0	04.02.2020	16S	2200.38	4.38204
Loc10	Control	T1	05.17.2020	16S	2440.43	4.60554
Loc10	Control	T1	05.17.2020	16S	2196.25	4.33342
Loc10	Control	T1	05.17.2020	16S	2150.17	4.36441
Loc10	Treated	T1	05.17.2020	16S	2240.68	4.57637
Loc10	Treated	T1	05.17.2020	16S	1806.86	4.52026
Loc10	Treated	T1	05.17.2020	16S	1486.42	4.30553
Loc11	Control	T0	05.12.2020	16S	2158.15	3.93098
Loc11	Control	T0	05.12.2020	16S	2169.11	4.50128
Loc11	Control	T0	05.12.2020	16S	2220	4.4164
Loc11	Treated	T0	05.12.2020	16S	1827.25	4.0494
Loc11	Treated	T0	05.12.2020	16S	1345.8	4.30679
Loc11	Treated	T0	05.12.2020	16S	1973.14	4.32426
Loc11	Control	T1	06.28.2020	16S	737.194	3.96227
Loc11	Control	T1	06.28.2020	16S	1199.33	4.27734
Loc11	Control	T1	06.28.2020	16S	1061.01	4.00471
Loc11	Treated	T1	06.28.2020	16S	861.089	3.81559
Loc11	Treated	T1	06.28.2020	16S	893.007	3.45932
Loc11	Treated	T1	06.28.2020	16S	1003.8	3.92242
Loc12	Control	T0	04.19.2020	16S	2200.04	4.64586
Loc12	Control	T0	04.19.2020	16S	2257.01	4.72876
Loc12	Control	T0	04.19.2020	16S	2112.28	4.35561
Loc12	Treated	T0	04.19.2020	16S	2538.43	4.62391
Loc12	Treated	T0	04.19.2020	16S	2381.72	4.87095
Loc12	Treated	T0	04.19.2020	16S	2460.25	4.13301
Loc12	Control	T1	06.05.2020	16S	1665.76	3.46934
Loc12	Control	T1	06.05.2020	16S	1612.44	3.44714
Loc12	Control	T1	06.05.2020	16S	1522.98	3.34974
Loc12	Treated	T1	06.05.2020	16S	1637.06	3.93158
Loc12	Treated	T1	06.05.2020	16S	1545	3.49304
Loc12	Treated	T1	06.05.2020	16S	1893.9	3.93673
Loc13	Control	T0	04.25.2020	16S	1926.81	4.21881
Loc13	Control	T0	04.25.2020	16S	1827	4.53884
Loc13	Control	T0	04.25.2020	16S	1651.01	3.58317
Loc13	Treated	T0	04.25.2020	16S	1375.26	4.12186
Loc13	Treated	T0	04.25.2020	16S	1208.81	3.92582
Loc13	Treated	T0	04.25.2020	16S	1637.18	3.78473
Loc13	Control	T1	06.11.2020	16S	1540.46	4.80153
Loc13	Control	T1	06.11.2020	16S	2111.63	4.66063
Loc13	Control	T1	06.11.2020	16S	1722.69	4.66227
Loc13	Treated	T1	06.11.2020	16S	1980.73	5.03595
Loc13	Treated	T1	06.11.2020	16S	1979.02	4.84679
Loc13	Treated	T1	06.11.2020	16S	2012.54	4.27142
Loc14	Control	T0	05.15.2020	16S	1639.07	5.10656
Loc14	Control	T0	05.15.2020	16S	1533.24	4.99121
Loc14	Control	T0	05.15.2020	16S	1561	5.00466
Loc14	Treated	T0	05.15.2020	16S	1849.66	5.2149
Loc14	Treated	T0	05.15.2020	16S	1720.59	4.98699
Loc14	Treated	T0	05.15.2020	16S	1582.24	5.05658
Loc14	Control	T1	06.30.2020	16S	1285.41	4.24518
Loc14	Control	T1	06.30.2020	16S	1624.91	4.37988
Loc14	Control	T1	06.30.2020	16S	1588.74	4.40052
Loc14	Treated	T1	06.30.2020	16S	2315.34	4.35725
Loc14	Treated	T1	06.30.2020	16S	2234.62	4.40583
Loc14	Treated	T1	06.30.2020	16S	1941.75	3.94981
Loc15	Control	T0	05.25.2020	16S	1756.78	3.76799
Loc15	Control	T0	05.25.2020	16S	1557.86	3.67776
Loc15	Control	T0	05.25.2020	16S	2068.49	3.96347
Loc15	Treated	T0	05.25.2020	16S	1823.73	3.87977
Loc15	Treated	T0	05.25.2020	16S	2235.33	3.94288
Loc15	Treated	T0	05.25.2020	16S	1951.92	3.76685
Loc15	Control	T1	07.11.2020	16S	1391.36	3.95618
Loc15	Control	T1	07.11.2020	16S	2037.89	3.95552
Loc15	Control	T1	07.11.2020	16S	1269.31	3.65643
Loc15	Treated	T1	07.11.2020	16S	1302.66	4.25934
Loc15	Treated	T1	07.11.2020	16S	1165.92	3.47263
Loc15	Treated	T1	07.11.2020	16S	1180.27	3.8175
Loc16	Control	T0	05.01.2020	16S	1602.41	3.89637
Loc16	Control	T0	05.01.2020	16S	1735.77	4.27725
Loc16	Control	T0	05.01.2020	16S	1761.57	4.14335
Loc16	Treated	T0	05.01.2020	16S	1386.78	3.76235
Loc16	Treated	T0	05.01.2020	16S	1396.26	4.19402
Loc16	Treated	T0	05.01.2020	16S	1529.07	4.21574
Loc16	Control	T1	06.15.2020	16S	1316.75	4.37569
Loc16	Control	T1	06.15.2020	16S	1414.71	4.51613
Loc16	Control	T1	06.15.2020	16S	1467.03	4.51271
Loc16	Treated	T1	06.15.2020	16S	1260.06	4.26568
Loc16	Treated	T1	06.15.2020	16S	734.697	4.00223
Loc16	Treated	T1	06.15.2020	16S	1137.61	4.10779
Loc17	Control	T0	5.28.2020	16S	1826.53	4.45321
Loc17	Control	T0	5.28.2020	16S	1623.56	4.4511
Loc17	Control	T0	5.28.2020	16S	1962.79	4.89615
Loc17	Treated	T0	5.28.2020	16S	1350.2	3.24567
Loc17	Treated	T0	5.28.2020	16S	1914.87	4.39636
Loc17	Treated	T0	5.28.2020	16S	1659.34	4.67849
Loc17	Control	T1	07.13.2020	16S	801.241	4.43828
Loc18	Control	T0	05.05.2020	16S	1648.22	3.97198
Loc18	Control	T0	05.05.2020	16S	1728.66	4.13241
Loc18	Control	T0	05.05.2020	16S	1515.4	4.10438
Loc18	Treated	T0	05.05.2020	16S	2096.92	4.36888
Loc18	Treated	T0	05.05.2020	16S	1213.36	4.14457
Loc18	Treated	T0	05.05.2020	16S	1359.79	4.26612
Loc18	Control	T1	06.19.2020	16S	1901.9	4.37257
Loc18	Control	T1	06.19.2020	16S	1958.14	4.31213
Loc18	Control	T1	06.19.2020	16S	2101.33	4.29304
Loc18	Treated	T1	06.19.2020	16S	2004.78	4.25789
Loc18	Treated	T1	06.19.2020	16S	1814.43	4.35785
Loc18	Treated	T1	06.19.2020	16S	1818.3	4.32737
Loc19	Control	T0	05.05.2020	16S	1697.33	4.50605
Loc19	Control	T0	05.05.2020	16S	1825.96	4.56906
Loc19	Control	T0	05.05.2020	16S	1677.53	4.62578
Loc19	Treated	T0	05.05.2020	16S	1727.63	4.9037
Loc19	Treated	T0	05.05.2020	16S	1759.22	4.56736
Loc19	Treated	T0	05.05.2020	16S	1883.58	4.51459
Loc19	Control	T1	06.19.2020	16S	1697.23	3.96995
Loc19	Control	T1	06.19.2020	16S	1560.64	3.60478
Loc19	Control	T1	06.19.2020	16S	1834	3.96706
Loc19	Treated	T1	06.19.2020	16S	2100.52	4.15892
Loc19	Treated	T1	06.19.2020	16S	1734.44	3.8889
Loc19	Treated	T1	06.19.2020	16S	1508.13	3.52705
Loc20	Control	T0	05.12.2020	16S	1868.24	4.45755
Loc20	Control	T0	05.12.2020	16S	1821.59	4.06024
Loc20	Control	T0	05.12.2020	16S	1680.96	3.93735
Loc20	Treated	T0	05.12.2020	16S	1454.66	3.59772
Loc20	Treated	T0	05.12.2020	16S	1825.07	3.91453
Loc20	Treated	T0	05.12.2020	16S	1893.72	4.6179
Loc20	Control	T1	06.22.2020	16S	1834.36	3.81912
Loc20	Control	T1	06.22.2020	16S	1670.74	4.00862
Loc20	Control	T1	06.22.2020	16S	1813.1	3.89807
Loc20	Treated	T1	06.22.2020	16S	1445.86	3.9276
Loc20	Treated	T1	06.22.2020	16S	1824.48	4.34134
Loc20	Treated	T1	06.22.2020	16S	1839.72	4.36199
Loc21	Control	T0	04.27.2020	16S	1889.85	4.34416
Loc21	Control	T0	04.27.2020	16S	1660.49	3.49524
Loc21	Control	T0	04.27.2020	16S	1829.37	3.50716
Loc21	Treated	T0	04.27.2020	16S	1829.14	4.06369
Loc21	Treated	T0	04.27.2020	16S	1769.67	4.10462
Loc21	Treated	T0	04.27.2020	16S	1810.36	3.86643
Loc21	Control	T1	06.08.2020	16S	1792.36	4.55442
Loc21	Control	T1	06.08.2020	16S	1883.16	4.69583
Loc21	Control	T1	06.08.2020	16S	1087.09	4.39196
Loc21	Treated	T1	06.08.2020	16S	1403.25	4.69358
Loc21	Treated	T1	06.08.2020	16S	1419.89	4.42101
Loc21	Treated	T1	06.08.2020	16S	1361.83	4.26049
Loc22	Control	T0	05.14.2020	16S	1287.95	3.58268
Loc22	Control	T0	05.14.2020	16S	1267.71	3.67744
Loc22	Control	T0	05.14.2020	16S	1095.53	3.4577
Loc22	Treated	T0	05.14.2020	16S	1169.76	3.21118
Loc22	Treated	T0	05.14.2020	16S	1132.32	3.52552
Loc22	Treated	T0	05.14.2020	16S	915.056	3.33999
Loc22	Control	T1	06.30.2020	16S	1001.1	2.84312
Loc22	Control	T1	06.30.2020	16S	949.976	2.84121
Loc22	Control	T1	06.30.2020	16S	1172.06	3.23567
Loc22	Treated	T1	06.30.2020	16S	1314.23	3.18001
Loc22	Treated	T1	06.30.2020	16S	1154.72	2.88057
Loc22	Treated	T1	06.30.2020	16S	1298.26	3.42176
Loc23	Control	T0	04.20.2020	16S	1968.34	3.9182
Loc23	Control	T0	04.20.2020	16S	1575	4.46489
Loc23	Control	T0	04.20.2020	16S	1823.22	4.4147
Loc23	Treated	T0	04.20.2020	16S	1720.1	4.59863
Loc23	Treated	T0	04.20.2020	16S	1814.06	4.444
Loc23	Treated	T0	04.20.2020	16S	1858.91	4.42198
Loc23	Control	T1	06.07.2020	16S	719.026	3.94935
Loc23	Control	T1	06.07.2020	16S	776.491	3.88929
Loc23	Control	T1	06.07.2020	16S	972.826	4.24916
Loc23	Treated	T1	06.07.2020	16S	1361.97	4.60882
Loc23	Treated	T1	06.07.2020	16S	1332.69	4.557
Loc23	Treated	T1	06.07.2020	16S	1285.04	4.41335
Loc6	Control	T1	06.15.2020	16S	1174.25	3.03152
Loc6	Control	T1	06.15.2020	16S	819.635	2.59424
Loc6	Control	T1	06.15.2020	16S	843.281	2.70188
Loc6	Control	T1	06.15.2020	16S	785.963	2.296
Loc6	Control	T1	06.15.2020	16S	934.158	2.87935
Loc6	Treated	T1	06.15.2020	16S	905.117	2.57513
Loc6	Treated	T1	06.15.2020	16S	1013.89	3.09149
Loc6	Treated	T1	06.15.2020	16S	1352.66	3.29361
Loc6	Treated	T1	06.15.2020	16S	1759.83	3.23182
Loc6	Treated	T1	06.15.2020	16S	1681.41	3.36638
Loc1	Control	T0	04.20.2020	ITS	287.556	2.39236
Loc1	Control	T0	04.20.2020	ITS	407.162	3.71592
Loc1	Control	T0	04.20.2020	ITS	447.261	4.06983
Loc1	Treated	T0	04.20.2020	ITS	408.062	3.49095
Loc1	Treated	T0	04.20.2020	ITS	370	4.10879
Loc1	Treated	T0	04.20.2020	ITS	384.097	4.03068
Loc1	Control	T1	06.07.2020	ITS	342.071	3.02762
Loc1	Control	T1	06.07.2020	ITS	284.571	2.76954
Loc1	Control	T1	06.07.2020	ITS	285.895	2.79394
Loc1	Treated	T1	06.07.2020	ITS	381.029	3.17063
Loc1	Treated	T1	06.07.2020	ITS	319.469	3.17203
Loc1	Treated	T1	06.07.2020	ITS	309.029	3.74971
Loc2	Control	T0	04.08.2020	ITS	397.312	4.10171
Loc2	Control	T0	04.08.2020	ITS	373.5	3.93992
Loc2	Control	T0	04.08.2020	ITS	371	3.32071
Loc2	Treated	T0	04.08.2020	ITS	312.455	3.7317
Loc2	Treated	T0	04.08.2020	ITS	274.118	3.47807
Loc2	Treated	T0	04.08.2020	ITS	305.517	3.81103
Loc2	Control	T1	05.23.2020	ITS	338.596	3.64264
Loc2	Control	T1	05.23.2020	ITS	303.05	3.59317
Loc2	Control	T1	05.23.2020	ITS	250	3.64405
Loc2	Treated	T1	05.23.2020	ITS	240.325	3.60138
Loc2	Treated	T1	05.23.2020	ITS	296.44	3.7167
Loc2	Treated	T1	05.23.2020	ITS	275.25	3.69195
Loc3	Control	T0	04.04.2020	ITS	345.522	3.37869
Loc3	Control	T0	04.04.2020	ITS	311.5	3.62919
Loc3	Control	T0	04.04.2020	ITS	377.774	3.90427
Loc3	Treated	T0	04.04.2020	ITS	333.025	3.78737
Loc3	Treated	T0	04.04.2020	ITS	377.07	3.96441
Loc3	Treated	T0	04.04.2020	ITS	317.552	3.96867
Loc3	Control	T1	05.19.2020	ITS	236.5	3.45888
Loc3	Control	T1	05.19.2020	ITS	193.476	3.44835
Loc3	Control	T1	05.19.2020	ITS	210.037	3.17067
Loc3	Treated	T1	05.19.2020	ITS	240.5	2.83927
Loc3	Treated	T1	05.19.2020	ITS	217.64	2.81713
Loc3	Treated	T1	05.19.2020	ITS	209.3	2.82369
Loc6	Control	T0	05.01.2020	ITS	388.6	3.57945
Loc6	Control	T0	05.01.2020	ITS	417.233	3.95504
Loc6	Control	T0	05.01.2020	ITS	433.022	4.007
Loc6	Treated	T0	05.01.2020	ITS	502.915	3.90242
Loc6	Treated	T0	05.01.2020	ITS	376.163	3.44972
Loc6	Treated	T0	05.01.2020	ITS	330.385	3.32131
Loc6	Control	T0	05.01.2020	ITS	366.957	3.64884
Loc6	Control	T0	05.01.2020	ITS	385.294	3.57689
Loc6	Control	T0	05.01.2020	ITS	650.511	2.96973
Loc6	Treated	T0	05.01.2020	ITS	536.632	3.05192
Loc6	Treated	T0	05.01.2020	ITS	494.333	3.20368
Loc6	Treated	T0	05.01.2020	ITS	472.092	3.22946
Loc7	Control	T0	05.01.2020	ITS	406.444	3.69377
Loc7	Control	T0	05.01.2020	ITS	400.521	3.84236
Loc7	Control	T0	05.01.2020	ITS	360.25	3.98882
Loc7	Treated	T0	05.01.2020	ITS	351	3.92189
Loc7	Treated	T0	05.01.2020	ITS	324.237	3.75379
Loc7	Treated	T0	05.01.2020	ITS	355.129	3.9838
Loc7	Control	T1	06.15.2020	ITS	134	2.31983
Loc7	Control	T1	06.15.2020	ITS	202.545	2.76513
Loc7	Control	T1	06.15.2020	ITS	287.553	3.14541
Loc7	Treated	T1	06.15.2020	ITS	196.3	2.07003
Loc7	Treated	T1	06.15.2020	ITS	333.115	3.62735
Loc7	Treated	T1	06.15.2020	ITS	315.194	3.75409
Loc8	Control	T0	5.28.2020	ITS	464.118	3.56489
Loc8	Control	T0	5.28.2020	ITS	472.652	3.91126
Loc8	Control	T0	5.28.2020	ITS	632.483	3.74107
Loc8	Treated	T0	5.28.2020	ITS	498.514	3.57361
Loc8	Treated	T0	5.28.2020	ITS	488.744	3.76856
Loc8	Treated	T0	5.28.2020	ITS	542.528	3.73653
Loc8	Control	T1	07.13.2020	ITS	297.814	3.13453
Loc8	Control	T1	07.13.2020	ITS	286.441	2.98678
Loc8	Control	T1	07.13.2020	ITS	237.029	2.98712
Loc8	Treated	T1	07.13.2020	ITS	369.838	2.96069
Loc8	Treated	T1	07.13.2020	ITS	441.8	3.206
Loc8	Treated	T1	07.13.2020	ITS	400	2.58057
Loc9	Control	T0	05.01.2020	ITS	340.941	3.89321
Loc9	Control	T0	05.01.2020	ITS	265.037	3.94047
Loc9	Control	T0	05.01.2020	ITS	482.667	3.66823
Loc9	Treated	T0	05.01.2020	ITS	539.054	3.84274
Loc9	Treated	T0	05.01.2020	ITS	393.382	3.72315
Loc9	Treated	T0	05.01.2020	ITS	497.717	3.66786
Loc9	Control	T1	06.15.2020	ITS	550	4.062
Loc9	Control	T1	06.15.2020	ITS	423.341	3.89902
Loc9	Control	T1	06.15.2020	ITS	367.623	3.60449
Loc9	Treated	T1	06.15.2020	ITS	443.13	4.03499
Loc9	Treated	T1	06.15.2020	ITS	377.774	3.84139
Loc9	Treated	T1	06.15.2020	ITS	284.636	3.79753
Loc10	Control	T0	04.01.2020	ITS	117.857	3.36027
Loc10	Control	T0	04.01.2020	ITS	301.957	3.21803
Loc10	Control	T0	04.01.2020	ITS	259.214	2.36645
Loc10	Treated	T0	04.01.2020	ITS	442.449	3.03165
Loc10	Treated	T0	04.01.2020	ITS	406.118	4.00068
Loc10	Treated	T0	04.01.2020	ITS	224.6	3.14398
Loc10	Control	T1	05.16.2020	ITS	148.1	2.26574
Loc10	Control	T1	05.16.2020	ITS	197.125	2.23721
Loc10	Control	T1	05.16.2020	ITS	207.533	2.29315
Loc10	Treated	T1	05.16.2020	ITS	194.435	2.37914
Loc10	Treated	T1	05.16.2020	ITS	179.615	2.9564
Loc10	Treated	T1	05.16.2020	ITS	193	2.45999
Loc11	Control	T0	05.07.2020	ITS	692.429	3.43829
Loc11	Control	T0	05.07.2020	ITS	419.25	3.48203
Loc11	Control	T0	05.07.2020	ITS	517.132	3.76187
Loc11	Treated	T0	05.07.2020	ITS	590.235	3.31406
Loc11	Treated	T0	05.07.2020	ITS	265.143	3.77749
Loc11	Treated	T0	05.07.2020	ITS	359.833	3.52756
Loc11	Control	T1	06.23.2020	ITS	250.55	3.90146
Loc11	Control	T1	06.23.2020	ITS	302.292	3.76598
Loc11	Control	T1	06.23.2020	ITS	251.9	3.63467
Loc11	Treated	T1	06.23.2020	ITS	286.353	3.95288
Loc11	Treated	T1	06.23.2020	ITS	235.5	3.56845
Loc11	Treated	T1	06.23.2020	ITS	220.24	2.23268
Loc12	Control	T0	04.14.2020	ITS	363.088	3.5312
Loc12	Control	T0	04.14.2020	ITS	365.886	3.94918
Loc12	Control	T0	04.14.2020	ITS	276.533	3.40969
Loc12	Treated	T0	04.14.2020	ITS	363.559	3.52966
Loc12	Treated	T0	04.14.2020	ITS	330.121	3.74916
Loc12	Treated	T0	04.14.2020	ITS	680.8	2.96564
Loc12	Control	T1	06.01.2020	ITS	412.718	3.83763
Loc12	Control	T1	06.01.2020	ITS	427.122	3.78882
Loc12	Control	T1	06.01.2020	ITS	354	3.73742
Loc12	Treated	T1	06.01.2020	ITS	395.685	3.44945
Loc12	Treated	T1	06.01.2020	ITS	467.141	3.5793
Loc12	Treated	T1	06.01.2020	ITS	286.636	3.43
Loc13	Control	T0	04.20.2020	ITS	604.132	3.20146
Loc13	Control	T0	04.20.2020	ITS	495.491	3.02712
Loc13	Control	T0	04.20.2020	ITS	581.392	2.73644
Loc13	Treated	T0	04.20.2020	ITS	487.491	3.84281
Loc13	Treated	T0	04.20.2020	ITS	289.885	2.88961
Loc13	Treated	T0	04.20.2020	ITS	278.091	3.45152
Loc13	Control	T1	06.07.2020	ITS	81.1111	0.664433
Loc13	Control	T1	06.07.2020	ITS	253.886	2.27019
Loc13	Control	T1	06.07.2020	ITS	219.118	2.63108
Loc13	Treated	T1	06.07.2020	ITS	343.8	3.63944
Loc13	Treated	T1	06.07.2020	ITS	343.923	3.5069
Loc13	Treated	T1	06.07.2020	ITS	312.935	3.41451
Loc14	Control	T0	05.15.2020	ITS	561.25	3.76046
Loc14	Control	T0	05.15.2020	ITS	560.909	3.44204
Loc14	Control	T0	05.15.2020	ITS	612.064	3.48414
Loc14	Treated	T0	05.15.2020	ITS	554.545	3.61967
Loc14	Treated	T0	05.15.2020	ITS	535.774	3.48943
Loc14	Treated	T0	05.15.2020	ITS	555.133	3.12703
Loc14	Control	T1	06.30.2020	ITS	521.685	3.24206
Loc14	Control	T1	06.30.2020	ITS	481.625	3.43735
Loc14	Control	T1	06.30.2020	ITS	504.75	3.6691
Loc14	Treated	T1	06.30.2020	ITS	233.333	3.49309
Loc14	Treated	T1	06.30.2020	ITS	550.917	3.76583
Loc14	Treated	T1	06.30.2020	ITS	522.045	3.28967
Loc15	Control	T0	05.20.2020	ITS	443	3.50773
Loc15	Control	T0	05.20.2020	ITS	440.769	3.48205
Loc15	Control	T0	05.20.2020	ITS	327.194	3.60589
Loc15	Treated	T0	05.20.2020	ITS	356.766	3.54279
Loc15	Treated	T0	05.20.2020	ITS	419.158	3.2838
Loc15	Treated	T0	05.20.2020	ITS	347.667	3.42742
Loc15	Control	T1	07.04.2020	ITS	259.037	2.68049
Loc15	Control	T1	07.04.2020	ITS	263.056	2.48939
Loc15	Control	T1	07.04.2020	ITS	262.115	2.24231
Loc15	Treated	T1	07.04.2020	ITS	231.774	2.74898
Loc15	Treated	T1	07.04.2020	ITS	356.122	2.9653
Loc15	Treated	T1	07.04.2020	ITS	391.22	2.83668
Loc16	Control	T0	05.01.2020	ITS	493.519	3.95641
Loc16	Control	T0	05.01.2020	ITS	434.727	3.88894
Loc16	Control	T0	05.01.2020	ITS	417.487	3.8865
Loc16	Treated	T0	05.01.2020	ITS	422.738	3.73231
Loc16	Treated	T0	05.01.2020	ITS	517.018	3.67831
Loc16	Treated	T0	05.01.2020	ITS	470.222	3.85716
Loc16	Control	T1	06.15.2020	ITS	370.333	3.55021
Loc16	Control	T1	06.15.2020	ITS	425.6	3.74489
Loc16	Control	T1	06.15.2020	ITS	330.533	3.97526
Loc16	Treated	T1	06.15.2020	ITS	258.55	3.16477
Loc16	Treated	T1	06.15.2020	ITS	263.474	3.1535
Loc16	Treated	T1	06.15.2020	ITS	343.538	3.34622
Loc17	Control	T0	5.28.2020	ITS	559.289	4.06441
Loc17	Control	T0	5.28.2020	ITS	499.784	3.99902
Loc17	Control	T0	5.28.2020	ITS	465.438	3.77855
Loc17	Treated	T0	5.28.2020	ITS	455.655	4.13171
Loc17	Treated	T0	5.28.2020	ITS	216.067	3.73368
Loc17	Treated	T0	5.28.2020	ITS	204.917	3.53825
Loc17	Control	T1	07.13.2020	ITS	431.814	3.92684
Loc17	Control	T1	07.13.2020	ITS	427.2	3.90064
Loc17	Control	T1	07.13.2020	ITS	437.279	3.85656
Loc17	Treated	T1	07.13.2020	ITS	419.717	3.29376
Loc17	Treated	T1	07.13.2020	ITS	367.5	2.73678
Loc17	Treated	T1	07.13.2020	ITS	400.9	3.79225
Loc18	Control	T0	05.01.2020	ITS	206.833	2.28014
Loc18	Control	T0	05.01.2020	ITS	200.65	2.39027
Loc18	Control	T0	05.01.2020	ITS	207.5	2.10156
Loc18	Treated	T0	05.01.2020	ITS	205.231	1.86832
Loc18	Treated	T0	05.01.2020	ITS	176.056	2.18579
Loc18	Treated	T0	05.01.2020	ITS	125.5	2.77783
Loc18	Control	T1	06.10.2020	ITS	306.941	2.9739
Loc18	Control	T1	06.10.2020	ITS	267.5	2.41645
Loc18	Control	T1	06.10.2020	ITS	285.464	2.37217
Loc18	Treated	T1	06.10.2020	ITS	272.5	1.89476
Loc18	Treated	T1	06.10.2020	ITS	245.583	1.73747
Loc18	Treated	T1	06.10.2020	ITS	252.435	1.74426
Loc19	Control	T0	05.01.2020	ITS	579.4	4.31273
Loc19	Control	T0	05.01.2020	ITS	693.875	4.28148
Loc19	Control	T0	05.01.2020	ITS	262.647	2.34563
Loc19	Treated	T0	05.01.2020	ITS	255.6	2.72259
Loc19	Treated	T0	05.01.2020	ITS	204.053	2.16938
Loc19	Treated	T0	05.01.2020	ITS	468.196	3.43978
Loc19	Control	T1	06.10.2020	ITS	337.5	2.67271
Loc19	Control	T1	06.10.2020	ITS	494.056	3.0308
Loc19	Control	T1	06.10.2020	ITS	426.06	2.57187
Loc19	Treated	T1	06.10.2020	ITS	456.59	2.66483
Loc19	Treated	T1	06.10.2020	ITS	366.227	2.44475
Loc19	Treated	T1	06.10.2020	ITS	383.592	2.88994
Loc20	Control	T0	05.03.2020	ITS	308.207	3.3508
Loc20	Control	T0	05.03.2020	ITS	615.696	4.40944
Loc20	Control	T0	05.03.2020	ITS	466.857	2.81829
Loc20	Treated	T0	05.03.2020	ITS	497.947	3.66127
Loc20	Treated	T0	05.03.2020	ITS	444.35	2.77387
Loc20	Treated	T0	05.03.2020	ITS	486.048	2.18239
Loc20	Control	T1	06.12.2020	ITS	451.078	3.63306
Loc20	Control	T1	06.12.2020	ITS	411.838	3.28712
Loc20	Control	T1	06.12.2020	ITS	409.32	3.50791
Loc20	Treated	T1	06.12.2020	ITS	236.138	1.43682
Loc20	Treated	T1	06.12.2020	ITS	303.75	2.31251
Loc20	Treated	T1	06.12.2020	ITS	309	1.96094
Loc21	Control	T0	04.17.2020	ITS	417.023	2.70965
Loc21	Control	T0	04.17.2020	ITS	404.25	3.57292
Loc21	Control	T0	04.17.2020	ITS	363.8	3.40065
Loc21	Treated	T0	04.17.2020	ITS	351.95	3.19749
Loc21	Treated	T0	04.17.2020	ITS	326.6	3.64362
Loc21	Treated	T0	04.17.2020	ITS	287.216	2.51163
Loc21	Control	T1	05.27.2020	ITS	330.273	3.12903
Loc21	Control	T1	05.27.2020	ITS	348.696	3.15027
Loc21	Control	T1	05.27.2020	ITS	339.03	3.23915
Loc21	Treated	T1	05.27.2020	ITS	303.65	2.87836
Loc21	Treated	T1	05.27.2020	ITS	250.417	3.12323
Loc21	Treated	T1	05.27.2020	ITS	356.357	3.28618
Loc22	Control	T0	05.08.2020	ITS	336.75	3.71222
Loc22	Control	T0	05.08.2020	ITS	303.027	3.7902
Loc22	Control	T0	05.08.2020	ITS	412.778	3.58469
Loc22	Treated	T0	05.08.2020	ITS	352.596	3.83614
Loc22	Treated	T0	05.08.2020	ITS	341.2	3.38297
Loc22	Treated	T0	05.08.2020	ITS	313.941	3.0194
Loc22	Control	T1	06.24.2020	ITS	323	3.7399
Loc22	Control	T1	06.24.2020	ITS	325.758	3.88447
Loc22	Control	T1	06.24.2020	ITS	291.029	2.38542
Loc22	Treated	T1	06.24.2020	ITS	315.4	3.68143
Loc22	Treated	T1	06.24.2020	ITS	336.977	3.32217
Loc22	Treated	T1	06.24.2020	ITS	410.393	2.60518
Loc23	Control	T0	04.20.2020	ITS	216.462	3.08461
Loc23	Control	T0	04.20.2020	ITS	608	3.39797
Loc23	Control	T0	04.20.2020	ITS	414.842	3.61968
Loc23	Treated	T0	04.20.2020	ITS	513.264	3.37455
Loc23	Treated	T0	04.20.2020	ITS	530	3.87718
Loc23	Treated	T0	04.20.2020	ITS	538.859	3.74948
Loc23	Control	T1	06.07.2020	ITS	305.833	3.86799
Loc23	Control	T1	06.07.2020	ITS	275.273	3.42446
Loc23	Control	T1	06.07.2020	ITS	320.5	3.6889
Loc23	Treated	T1	06.07.2020	ITS	332.8	3.24794
Loc23	Treated	T1	06.07.2020	ITS	269.778	3.56164
Loc23	Treated	T1	06.07.2020	ITS	311.364	3.77905
Loc6	Control	T1	06.15.2020	ITS	465.059	3.60619
Loc6	Control	T1	06.15.2020	ITS	438.442	3.86113
Loc6	Control	T1	06.15.2020	ITS	448.217	3.90809
Loc6	Control	T1	06.15.2020	ITS	464.058	3.70921
Loc6	Control	T1	06.15.2020	ITS	430.776	3.76596
Loc6	Treated	T1	06.15.2020	ITS	439.603	3.48306
Loc6	Treated	T1	06.15.2020	ITS	440	3.79882
Loc6	Treated	T1	06.15.2020	ITS	327.441	3.80422
Loc6	Treated	T1	06.15.2020	ITS	282	3.99745
Loc6	Treated	T1	06.15.2020	ITS	296.833	3.99891

## Sheet: Table_S2
Table S2. Full description of selected environmental features
feature	feature_description	units	temporal_scope
soil_temperature_modis__m02__h12__median	Monthly median soil temperature during day time based on data from the MODIS sensor.	ºC	monthly
ndvi__m04_d01__mean	Average NDVI of the first third of April (m04) between 1999 and 2019.	relative	10 days
soil_temperature_bioclim__wettest_quarter__mean	Mean Temperature of Wettest Quarter	ºC	seasonal
soil_temperature_bioclim__annual__seasonality	Temperature Seasonality (standard deviation ×100)	ºC	annual
precipitation__coldest_quarter__sum	The coldest quarter of the year is determined (to the nearest month)	kg m^-2 month^-1	seasonal
soil_sand__percent	Soil sand percent in the first 30cm of soil.	%	multidecadal
soil_clay__percent	Clay percentage of the first 30cm of soil.	%	multidecadal
ndvi__m07_d01__mean	Average NDVI of the first third of July (m07) between 1999 and 2019.	relative	10 days

## Sheet: Table S3
Table S3. Soil physico chemical properties mean and standard deviation by each geographical location
Location	B_ppm	Calcium ppm	Clay_content	Cu_ppm	K_ppm	Mg_ppm	Mn_ppm	NO3_ppm	OM_soil	P_ppm	S_ppm	Sand_content	Silt_content	Zn_ppm
Loc1	0.90 (0.04)	3931.67 (170.37)	22.33 (1.97)	2.75 (0.44)	353.00 (64.54)	301.00 (37.64)	2.30 (0.33)	27.10 (6.51)	1.98 (0.21)	59.18 (13.38)	21.88 (3.83)	51.50 (0.84)	26.17 (1.83)	1.41 (0.16)
Loc10	0.60 (0.26)	580.83 (33.28)	5.50 (0.55)	0.23 (0.05)	199.83 (45.54)	138.83 (6.18)	3.67 (1.01)	30.75 (9.19)	0.53 (0.05)	135.17 (12.88)	17.73 (7.13)	84.83 (0.41)	9.67 (0.52)	3.14 (0.34)
Loc11	0.66 (0.06)	887.50 (51.20)	11.67 (1.03)	0.25 (0.04)	307.83 (281.27)	183.17 (8.52)	3.02 (0.59)	26.70 (9.33)	1.28 (0.15)	21.17 (5.85)	60.28 (26.35)	85.00 (1.10)	3.33 (1.21)	4.30 (0.72)
Loc12	0.22 (0.02)	477.17 (80.19)	9.33 (1.63)	0.28 (0.07)	188.50 (22.86)	73.83 (18.47)	7.77 (1.85)	5.60 (1.90)	1.52 (0.33)	32.67 (9.40)	9.70 (5.28)	77.00 (4.00)	13.67 (2.42)	1.05 (0.23)
Loc13	0.23 (0.04)	619.67 (75.59)	9.67 (1.51)	0.51 (0.03)	180.17 (51.83)	104.83 (12.38)	13.38 (2.77)	32.97 (15.92)	1.28 (0.18)	151.00 (20.24)	8.95 (3.76)	77.00 (1.41)	13.33 (1.37)	1.94 (0.36)
Loc14	0.50 (0.07)	897.67 (64.90)	21.67 (2.73)	7.45 (0.49)	192.67 (16.23)	107.50 (15.40)	6.22 (1.01)	19.08 (2.88)	3.95 (0.15)	422.83 (13.78)	19.95 (3.39)	38.17 (3.71)	40.17 (1.60)	2.17 (0.25)
Loc15	1.06 (0.43)	715.67 (145.27)	13.33 (1.03)	0.34 (0.02)	88.83 (16.89)	86.00 (6.69)	1.88 (1.73)	7.80 (1.46)	2.77 (0.08)	55.67 (2.34)	18.47 (4.38)	45.33 (2.94)	41.33 (2.58)	0.30 (0.08)
Loc16	0.23 (0.05)	848.83 (38.84)	12.33 (1.86)	0.86 (0.32)	238.83 (64.32)	167.17 (4.49)	61.53 (16.48)	15.40 (5.44)	1.55 (0.18)	53.00 (5.55)	18.32 (11.99)	82.00 (2.83)	5.67 (1.37)	3.92 (1.32)
Loc17	0.16 (0.02)	958.50 (107.70)	11.00 (1.79)	0.57 (0.07)	357.83 (59.15)	231.17 (31.51)	6.97 (1.73)	8.12 (1.25)	2.00 (0.25)	120.33 (8.33)	17.22 (7.93)	71.00 (3.35)	18.00 (2.19)	2.99 (0.35)
Loc18	0.08 (0.01)	264.00 (38.74)	8.00 (0.00)	0.47 (0.13)	153.33 (22.92)	65.00 (8.02)	5.33 (1.70)	3.68 (0.71)	0.77 (0.05)	87.50 (12.21)	20.52 (2.92)	84.83 (1.60)	7.17 (1.60)	1.13 (0.26)
Loc19	0.14 (0.01)	465.83 (40.02)	16.67 (1.03)	0.40 (0.13)	256.50 (32.18)	77.67 (6.65)	7.07 (1.74)	2.00 (2.02)	1.23 (0.15)	94.83 (12.69)	50.58 (11.85)	77.67 (1.21)	5.67 (1.51)	2.62 (0.23)
Loc2	0.63 (0.06)	5304.17 (314.92)	36.00 (2.53)	0.93 (0.27)	114.50 (36.65)	631.67 (47.47)	4.27 (2.55)	10.53 (3.90)	2.22 (0.10)	9.00 (1.27)	19.03 (4.81)	23.67 (2.66)	40.33 (4.63)	1.49 (0.33)
Loc20	0.15 (0.01)	455.83 (34.48)	16.33 (1.51)	0.42 (0.10)	288.17 (36.90)	65.50 (8.12)	9.88 (1.64)	3.20 (4.79)	1.10 (0.06)	107.17 (9.70)	58.92 (18.22)	77.33 (0.82)	6.33 (1.03)	3.64 (0.66)
Loc21	0.51 (0.18)	4055.00 (1171.64)	7.17 (0.41)	0.92 (0.12)	340.50 (47.84)	457.83 (34.10)	3.17 (0.31)	7.25 (2.79)	1.00 (0.06)	165.83 (10.40)	31.73 (17.65)	89.33 (0.82)	3.50 (0.84)	2.84 (0.48)
Loc22	0.73 (0.07)	1400.17 (136.13)	17.17 (0.75)	0.29 (0.05)	381.17 (45.96)	260.00 (25.95)	1.42 (0.19)	9.08 (2.06)	1.68 (0.10)	35.50 (2.59)	12.15 (1.18)	63.00 (1.41)	19.83 (1.83)	1.32 (0.53)
Loc23	0.72 (0.02)	2119.17 (128.51)	19.50 (0.84)	1.19 (0.10)	579.00 (123.86)	264.83 (23.54)	32.10 (7.09)	18.58 (2.88)	1.82 (0.08)	203.50 (16.38)	43.75 (13.28)	67.83 (1.17)	12.67 (1.37)	4.26 (0.73)
Loc3	0.31 (0.05)	2672.50 (214.58)	27.33 (1.03)	0.87 (0.04)	253.17 (27.97)	369.17 (11.75)	2.87 (0.24)	37.97 (6.27)	1.92 (0.44)	108.83 (3.49)	15.03 (3.53)	33.17 (1.33)	39.50 (1.76)	2.12 (0.19)
Loc7	0.41 (0.09)	1388.00 (268.28)	13.33 (1.03)	0.85 (0.07)	256.33 (29.92)	340.17 (10.63)	4.08 (0.98)	11.33 (2.41)	1.40 (0.17)	59.83 (8.18)	21.73 (7.58)	72.00 (1.41)	14.67 (2.16)	2.22 (0.20)
Loc8	0.33 (0.05)	1220.50 (116.73)	14.67 (0.82)	0.83 (0.06)	275.83 (65.95)	198.67 (24.78)	10.02 (2.41)	27.47 (4.42)	1.62 (0.08)	54.62 (20.85)	45.83 (27.59)	51.00 (1.10)	34.33 (1.63)	2.05 (0.31)
Loc9	1.24 (0.46)	1171.83 (184.91)	7.33 (1.03)	1.28 (0.52)	591.67 (50.86)	288.33 (13.97)	6.20 (1.84)	48.08 (12.69)	1.82 (0.08)	55.93 (5.64)	22.62 (7.49)	48.67 (1.63)	44.00 (2.19)	4.51 (0.40)

## Sheet: Table S4
Table S4. Distribution of variables across networks clusters.
index	gen	var_type	cluster
ndvi_m04_mean	Environmental	Environmental	1
ndvi_m07_mean	Environmental	Environmental	1
precip_coldest_qrt_sum	Environmental	Environmental	1
T0-16S_chao1	Microbiome	Biodiversity index	1
T0-16S_diversity_shannon	Microbiome	Biodiversity index	1
T0-ITS_chao1	Microbiome	Biodiversity index	1
T1-16S_chao1	Microbiome	Biodiversity index	1
T1-16S_diversity_shannon	Microbiome	Biodiversity index	1
T1-ITS_coex_modularity	Microbiome	Network property	1
T1-ITS_coex_transitivity	Microbiome	Network property	1
Cu_ppm_soil	Soil	Soil	1
OM_soil_soil	Soil	Soil	1
P_ppm_soil	Soil	Soil	1
soil_clay_pct	Environmental	Environmental	2
T0-ITS_diversity_shannon	Microbiome	Biodiversity index	2
T0-16S_coex_transitivity	Microbiome	Network property	2
T0-ITS_coex_ave.p.length	Microbiome	Network property	2
T0-ITS_coex_modularity	Microbiome	Network property	2
T0-ITS_coex_transitivity	Microbiome	Network property	2
T0-ITS_cooc_transitivity	Microbiome	Network property	2
T1-16S_coex_transitivity	Microbiome	Network property	2
Ca_content_petiole	Petiole	Petiole	2
Fe_ppm_petiole	Petiole	Petiole	2
Mg_content_petiole	Petiole	Petiole	2
N_content_petiole	Petiole	Petiole	2
ppm.Cu_petiole	Petiole	Petiole	2
S_content_petiole	Petiole	Petiole	2
Calcium ppm_soil	Soil	Soil	2
Clay_content_soil	Soil	Soil	2
Mg_ppm_soil	Soil	Soil	2
Silt_content_soil	Soil	Soil	2
yield_cwt_acre	Yield	Yield	2
soil_sand_pct	Environmental	Environmental	3
soil_Temperature_annual_seas	Environmental	Environmental	3
soil_Temperature_wettest_qrt	Environmental	Environmental	3
T0-16S_coex_ave.p.length	Microbiome	Network property	3
T0-16S_coex_modularity	Microbiome	Network property	3
T0-16S_cooc_transitivity	Microbiome	Network property	3
T0-ITS_cooc_ave.p.length	Microbiome	Network property	3
T0-ITS_cooc_modularity	Microbiome	Network property	3
T1-16S_coex_ave.p.length	Microbiome	Network property	3
T1-16S_coex_modularity	Microbiome	Network property	3
T1-16S_cooc_transitivity	Microbiome	Network property	3
T1-ITS_cooc_transitivity	Microbiome	Network property	3
K_content_petiole	Petiole	Petiole	3
ppm.Mn_petiole	Petiole	Petiole	3
ppm.Zn_petiole	Petiole	Petiole	3
B_ppm_p_qual	Potato Quality	Potato Quality	3
Ca_pct_p_qual	Potato Quality	Potato Quality	3
Cu_ppm_p_qual	Potato Quality	Potato Quality	3
Fe_ppm_p_qual	Potato Quality	Potato Quality	3
K_pct_p_qual	Potato Quality	Potato Quality	3
Mg_pct_p_qual	Potato Quality	Potato Quality	3
Mn_ppm_p_qual	Potato Quality	Potato Quality	3
Na_pct_p_qual	Potato Quality	Potato Quality	3
P_pct_p_qual	Potato Quality	Potato Quality	3
S_pct_p_qual	Potato Quality	Potato Quality	3
Total_N_pct_p_qual	Potato Quality	Potato Quality	3
Zn_ppm_p_qual	Potato Quality	Potato Quality	3
Mn_ppm_soil	Soil	Soil	3
Sand_content_soil	Soil	Soil	3
soil_Temperature_h12_med	Environmental	Environmental	4
T0-16S_cooc_ave.p.length	Microbiome	Network property	4
T0-16S_cooc_modularity	Microbiome	Network property	4
T1-16S_cooc_ave.p.length	Microbiome	Network property	4
T1-16S_cooc_modularity	Microbiome	Network property	4
T1-ITS_cooc_modularity	Microbiome	Network property	4
P_content_petiole	Petiole	Petiole	4
ppm.B_petiole	Petiole	Petiole	4
B_ppm_soil	Soil	Soil	4
K_ppm_soil	Soil	Soil	4
NO3_ppm_soil	Soil	Soil	4
S_ppm_soil	Soil	Soil	4
Zn_ppm_soil	Soil	Soil	4

## Sheet: Table_S5_Table_S6
Table S5. Highest correlation between microbiome diversity (ordination axes by marker) with weather and soil, petiole and peel physicochemical data. Only significant results are reported (p-value < 0.05)
variable	Variable type	marker	R	p-value
Soil_Temperature_wettest_qrt	environmental	16S-ITS	51.14%-40.73%	0.01
Silt_content	soil	16S	0.4555	0.01
ppm.Zn	petiole	16S	0.4098	0.01
precip_coldest_qrt_sum	environmental	16S	0.4023	0.01
Mn_ppm	soil	16S	0.3993	0.01
Mn_ppm	petiole	!6S	0.3838	0.01
Sand_content	soil	ITS	0.3827	0.01
Zn_ppm	soil	ITS	0.3338	0.01
Soi_Temperature_h13_med	environmental	16S	0.3018	0.01
Table S6. Correlation between microbiome diversity (ordination axes by marker) with all weather and soil, petiole and peel physicochemical data.
variable	marker	R	p-value
N_content_petiole	16S_Global	0.115	0.01
P_content_petiole	16S_Global	0.1541	0.01
K_content_petiole	16S_Global	0.2316	0.01
S_content_petiole	16S_Global	0.0657	0.05
Ca_content_petiole	16S_Global	0.1746	0.01
Mg_content_petiole	16S_Global	0.276	0.01
ppm.Zn_petiole	16S_Global	0.4098	0.01
Fe_ppm_petiole	16S_Global	0.1173	0.01
ppm.Mn_petiole	16S_Global	0.3339	0.01
ppm.Cu_petiole	16S_Global	0.1612	0.01
ppm.B_petiole	16S_Global	0.0124	0.65
Total_N_pct_p_qual	16S_Global	0.006	0.84
P_pct_p_qual	16S_Global	0.0253	0.35
K_pct_p_qual	16S_Global	0.1135	0.01
S_pct_p_qual	16S_Global	0.0539	0.15
Ca_pct_p_qual	16S_Global	0.0821	0.06
Mg_pct_p_qual	16S_Global	0.1145	0.01
Na_pct_p_qual	16S_Global	0.1425	0.01
Zn_ppm_p_qual	16S_Global	0.0791	0.01
Fe_ppm_p_qual	16S_Global	0.1185	0.02
Mn_ppm_p_qual	16S_Global	0.1515	0.01
Cu_ppm_p_qual	16S_Global	0.156	0.01
B_ppm_p_qual	16S_Global	0.0588	0.13
OM_soil_soil	16S_Global	0.1221	0.01
NO3_ppm_soil	16S_Global	0.2923	0.01
K_ppm_soil	16S_Global	0.0872	0.01
S_ppm_soil	16S_Global	0.0108	0.67
Zn_ppm_soil	16S_Global	0.1882	0.01
Mn_ppm_soil	16S_Global	0.3993	0.01
Cu_ppm_soil	16S_Global	0.0792	0.02
Calcium.ppm_soil	16S_Global	0.1556	0.01
Mg_ppm_soil	16S_Global	0.1971	0.01
B_ppm_soil	16S_Global	0.1465	0.01
Sand_content_soil	16S_Global	0.3827	0.01
Silt_content_soil	16S_Global	0.4355	0.01
Clay_content_soil	16S_Global	0.16	0.01
P_ppm_soil	16S_Global	0.111	0.02
soil_Temperature_h13_med	16S_Global	0.3018	0.01
ndvi_m04_mean	16S_Global	0.1777	0.01
soil_Temperature_wettest_qrt	16S_Global	0.5114	0.01
soil_Temperature_annual_seas	16S_Global	0.0058	0.8
precip_coldest_qrt_sum	16S_Global	0.4023	0.01
soil_sand_pct	16S_Global	0.1775	0.01
soil_clay_pct	16S_Global	0.0231	0.36
ndvi_m07_mean	16S_Global	0.1314	0.02
N_content_petiole	ITS_Global	0.0506	0.07
P_content_petiole	ITS_Global	0.0462	0.15
K_content_petiole	ITS_Global	0.02	0.42
S_content_petiole	ITS_Global	0.069	0.05
Ca_content_petiole	ITS_Global	0.1647	0.01
Mg_content_petiole	ITS_Global	0.1318	0.01
ppm.Zn_petiole	ITS_Global	0.0393	0.29
Fe_ppm_petiole	ITS_Global	0.0528	0.07
ppm.Mn_petiole	ITS_Global	0.0148	0.56
ppm.Cu_petiole	ITS_Global	0.0572	0.06
ppm.B_petiole	ITS_Global	0.0302	0.27
Total_N_pct_p_qual	ITS_Global	0.0193	0.43
P_pct_p_qual	ITS_Global	0.1079	0.02
K_pct_p_qual	ITS_Global	0.0907	0.04
S_pct_p_qual	ITS_Global	0.0091	0.71
Ca_pct_p_qual	ITS_Global	0.1547	0.01
Mg_pct_p_qual	ITS_Global	0.0489	0.18
Na_pct_p_qual	ITS_Global	0.0121	0.69
Zn_ppm_p_qual	ITS_Global	0.0034	0.86
Fe_ppm_p_qual	ITS_Global	0.1563	0.02
Mn_ppm_p_qual	ITS_Global	0.0581	0.09
Cu_ppm_p_qual	ITS_Global	0.0928	0.03
B_ppm_p_qual	ITS_Global	0.0533	0.15
OM_soil_soil	ITS_Global	0.0998	0.02
NO3_ppm_soil	ITS_Global	0.0535	0.12
K_ppm_soil	ITS_Global	0.2144	0.01
S_ppm_soil	ITS_Global	0.2182	0.01
Zn_ppm_soil	ITS_Global	0.31	0.01
Mn_ppm_soil	ITS_Global	0.0371	0.2
Cu_ppm_soil	ITS_Global	0.0697	0.1
Calcium.ppm_soil	ITS_Global	0.0904	0.02
Mg_ppm_soil	ITS_Global	0.1181	0.01
B_ppm_soil	ITS_Global	0.0321	0.3
Sand_content_soil	ITS_Global	0.2414	0.01
Silt_content_soil	ITS_Global	0.2218	0.01
Clay_content_soil	ITS_Global	0.1356	0.01
P_ppm_soil	ITS_Global	0.1625	0.01
soil_Temperature_h13_med	ITS_Global	0.0181	0.47
ndvi_m04_mean	ITS_Global	0.2325	0.01
soil_Temperature_wettest_qrt	ITS_Global	0.4074	0.01
soil_Temperature_annual_seas	ITS_Global	0.1229	0.02
precip_coldest_qrt_sum	ITS_Global	0.2222	0.01
soil_sand_pct	ITS_Global	0.2705	0.01
soil_clay_pct	ITS_Global	0.0543	0.07
ndvi_m07_mean	ITS_Global	0.1496	0.01
